# Supplementary material for: Campylobacter in aquatic and terrestrial mammals is driven by life traits: A systematic review and meta-analysis
Source: Frontiers journal article supplement (doi:10.3389/fevo.2023.1070519), 2023-02-02
Supplement: Data_Sheet_2.PDF [file Data_Sheet_2.PDF]

**PRISMA 2020 flow diagram for new systematic reviews which included searches of databases and registers only**

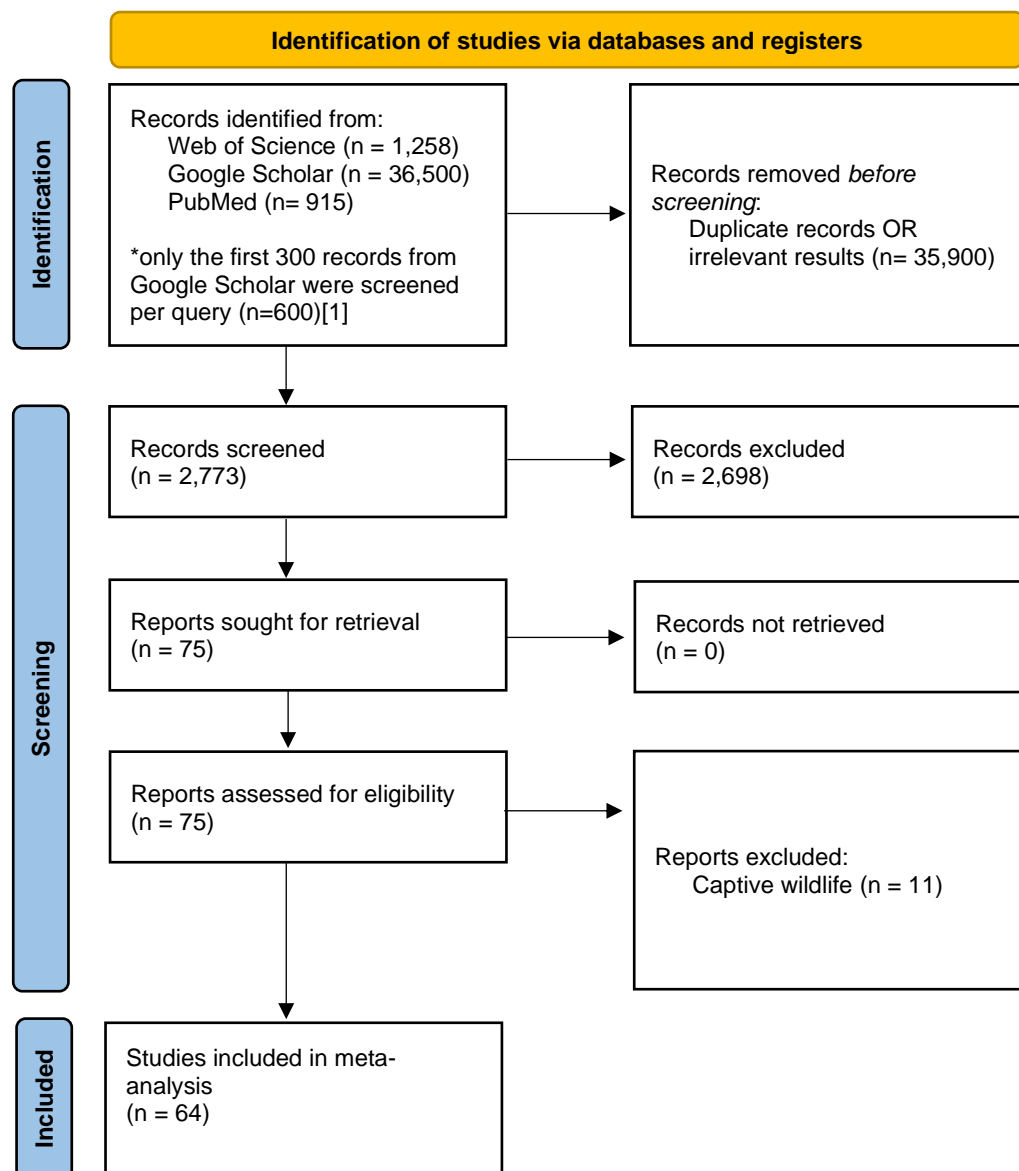

From: Page MJ, McKenzie JE, Bossuyt PM, Boutron I, Hoffmann TC, Mulrow CD, et al. The PRISMA 2020 statement: an updated guideline for reporting systematic reviews. *BMJ* 2021;372:n71. doi: 10.1136/bmj.n71

For more information, visit: <http://www.prisma-statement.org/>

1. Haddaway, N.R., et al., *The Role of Google Scholar in Evidence Reviews and Its Applicability to Grey Literature Searching*. PLOS ONE, 2015. **10**(9): p. e0138237.
